# Supplementary material for: Evaluating the composition and processing potential of novel sources of Brazilian biomass for sustainable biorenewables production
Source: PubMed Central journal article supplement (PMC4028816; doi:10.1186/1754-6834-7-10), 2014-01-18

## SUPPLEMENTARY FILE 1

Surface images obtained by SEM showing the silica bodies (phytoliths) on plant tissue. (a) *P. maximum*; (b) *P. purpureum* and (c) *B. brizantha*.

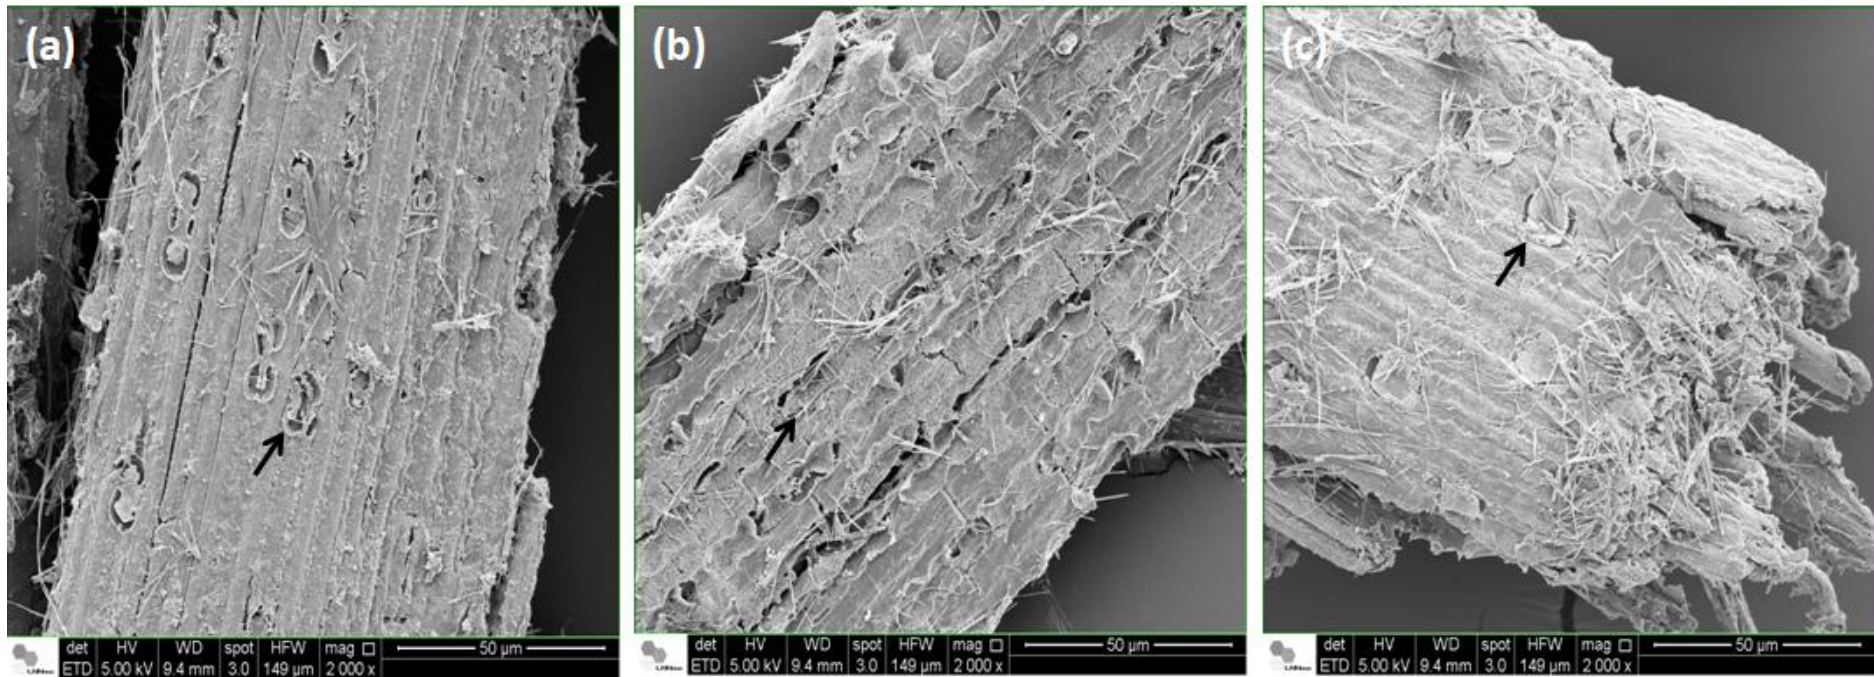

Supplement: 1754-6834-7-10-S1.pdf [file 1754-6834-7-10-S1.pdf]
